# Supplementary material for: Single Stranded Fully Modified-Phosphorothioate Oligonucleotides can Induce Structured Nuclear Inclusions, Alter Nuclear Protein Localization and Disturb the Transcriptome In Vitro
Source: PubMed Central journal article supplement (PMC9019733; doi:10.3389/fgene.2022.791416), 2022-04-06
Supplement: DataSheet1.pdf [file DataSheet1.pdf]

## Supplementary Figures:

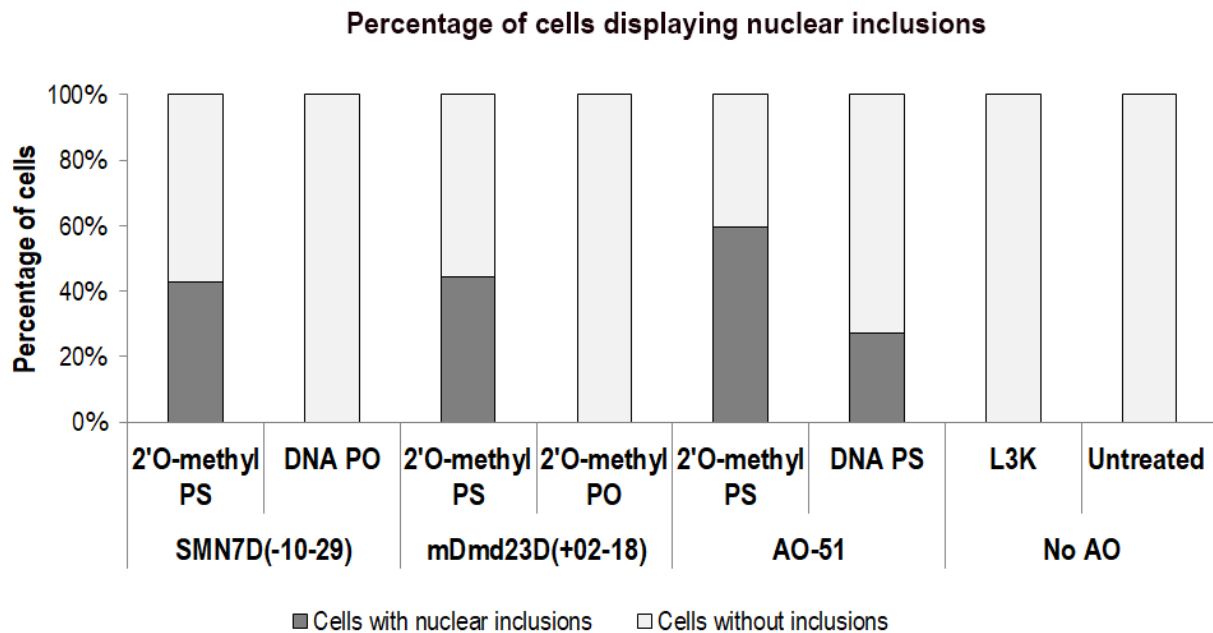

**Supplementary Figure S1 – Formation of AO-induced nuclear inclusions associated with phosphorothioate backbone.** Graph showing the percentage of fibroblasts containing nuclear inclusions following antisense transfection of different AO chemistries transfected at 100 nM, with a minimum of 200 cells counted per sample. AO chemistries evaluated include: 2' O-methyl modified bases on a phosphorothioate (PS) backbone (*SMN7D(-10-29)*, *mDmd23D(+02-18)*) (Gebski et al. 2005) and AO-51 (**Supplementary Table S3**), DNA unmodified bases on an unmodified PO backbone (*SMN7D(-10-29)*), 2' O-methyl modified bases on a phosphodiester (PO) backbone (*mDmd23D(+02-18)*), DNA unmodified bases on a PS backbone (AO-51), and compared to fibroblasts treated with Lipofectamine 3000 (L3K) left untreated.

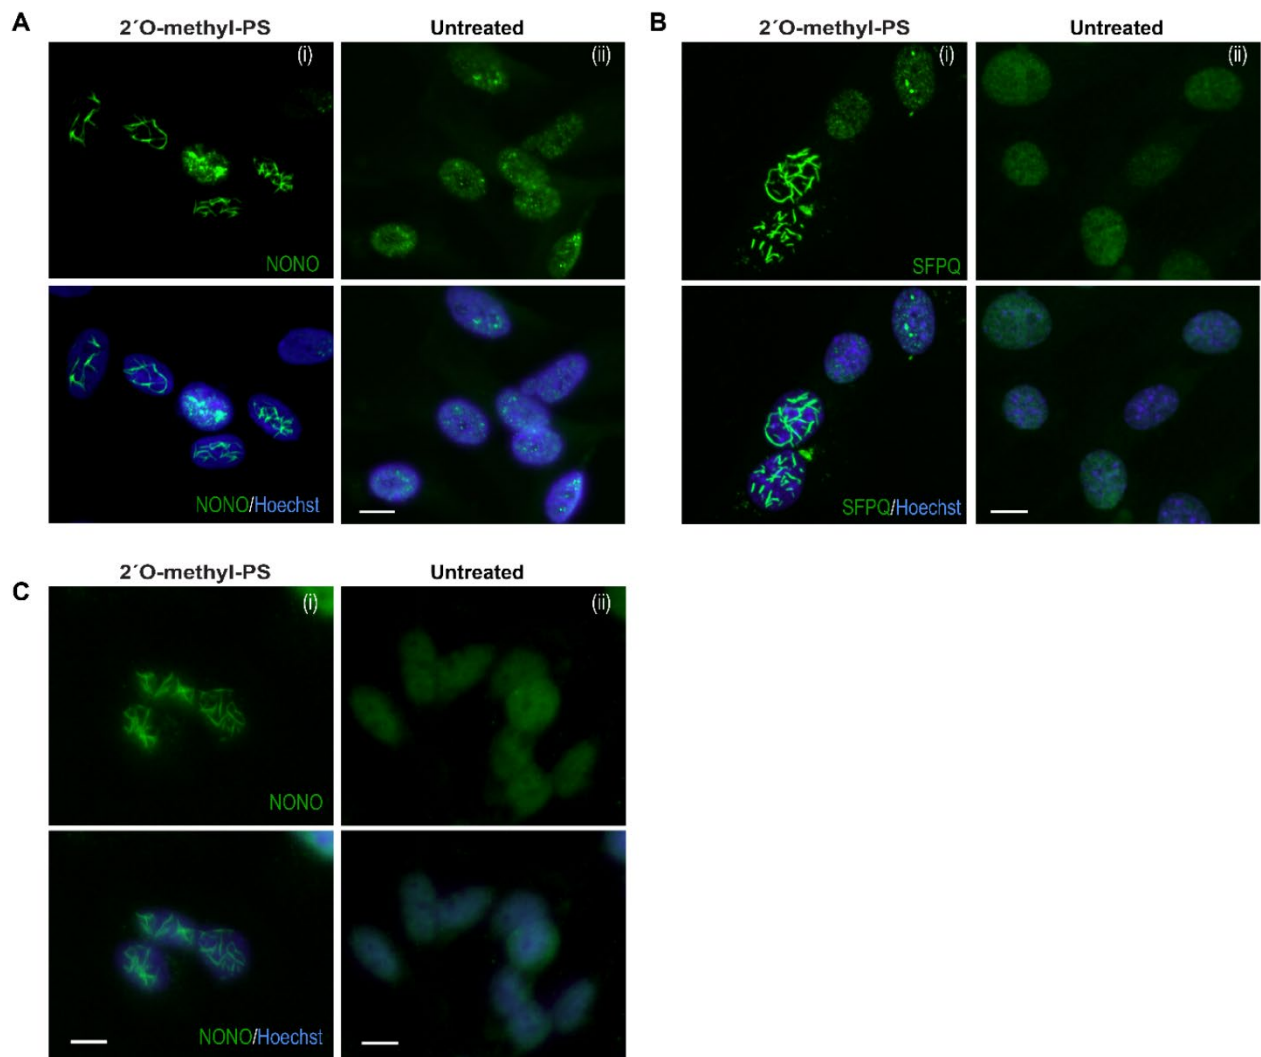

**Supplementary Figure S2 – Immunofluorescence staining of paraspeckle proteins in additional cell types.** Staining was carried out following transfection with **(A)** (i) 2' O-methyl phosphorothioate *SMN7D(-10-29)* in primary human myogenic cells; **(B)** (i) 2' O-methyl phosphorothioate AO targeting *Smn* in mouse myogenic cells; and **(C)** (i) the 2' O-methyl phosphorothioate control AO in SH-SY5Y neuroblastoma cells. (i) 2' O-methyl phosphorothioate-transfected and (ii) untreated shown in each panel. NONO was immunostained in human cells and SFPQ in mouse cells. Scale bar = 10  $\mu$ m.

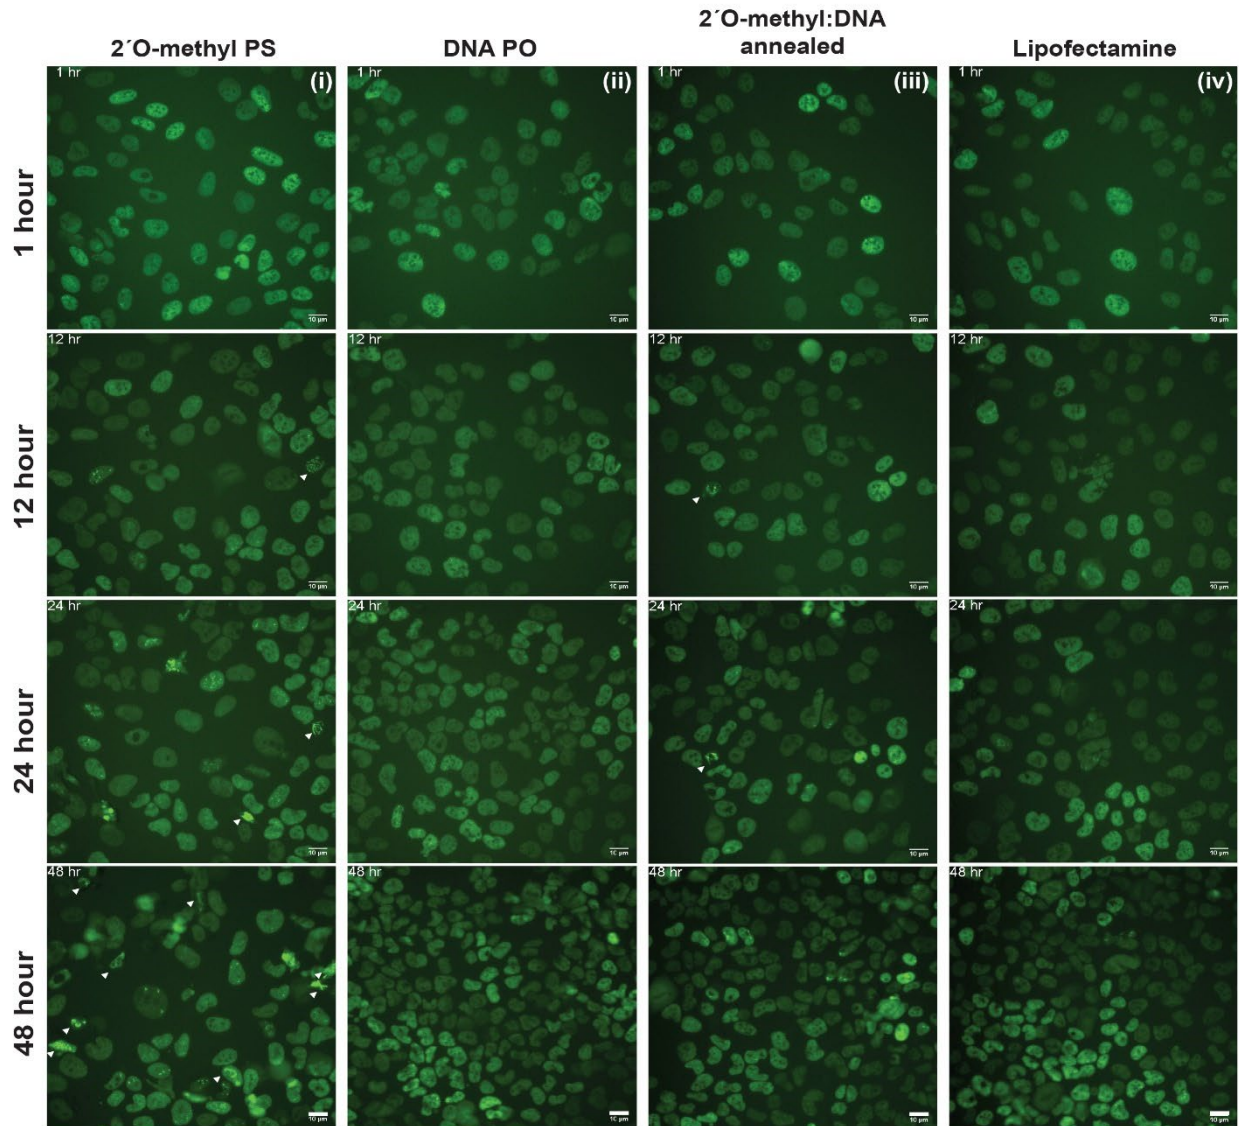

**Supplementary Figure S3 – Images from live cell imaging of GFP-SFPQ expressing U2OS cells transfected with 2' O-methyl phosphorothioate AO and controls.** Live cell images were captured following transfection (150 nM) with (i) 2' O-methyl PS, (ii) DNA PO, (iii) annealed 2' O-methyl PS and DNA (2' O-methyl:DNA) AOs and (iv) lipofectamine only control over 48 hours, with still images at 1, 12, 24 and 48 hours displayed. Nuclei showing fibril-like SFPQ positive inclusions are indicated with 'Δ'. Scale bar = 10 μm. Full time-course videos are available in **Supplementary Videos S1-S4**.

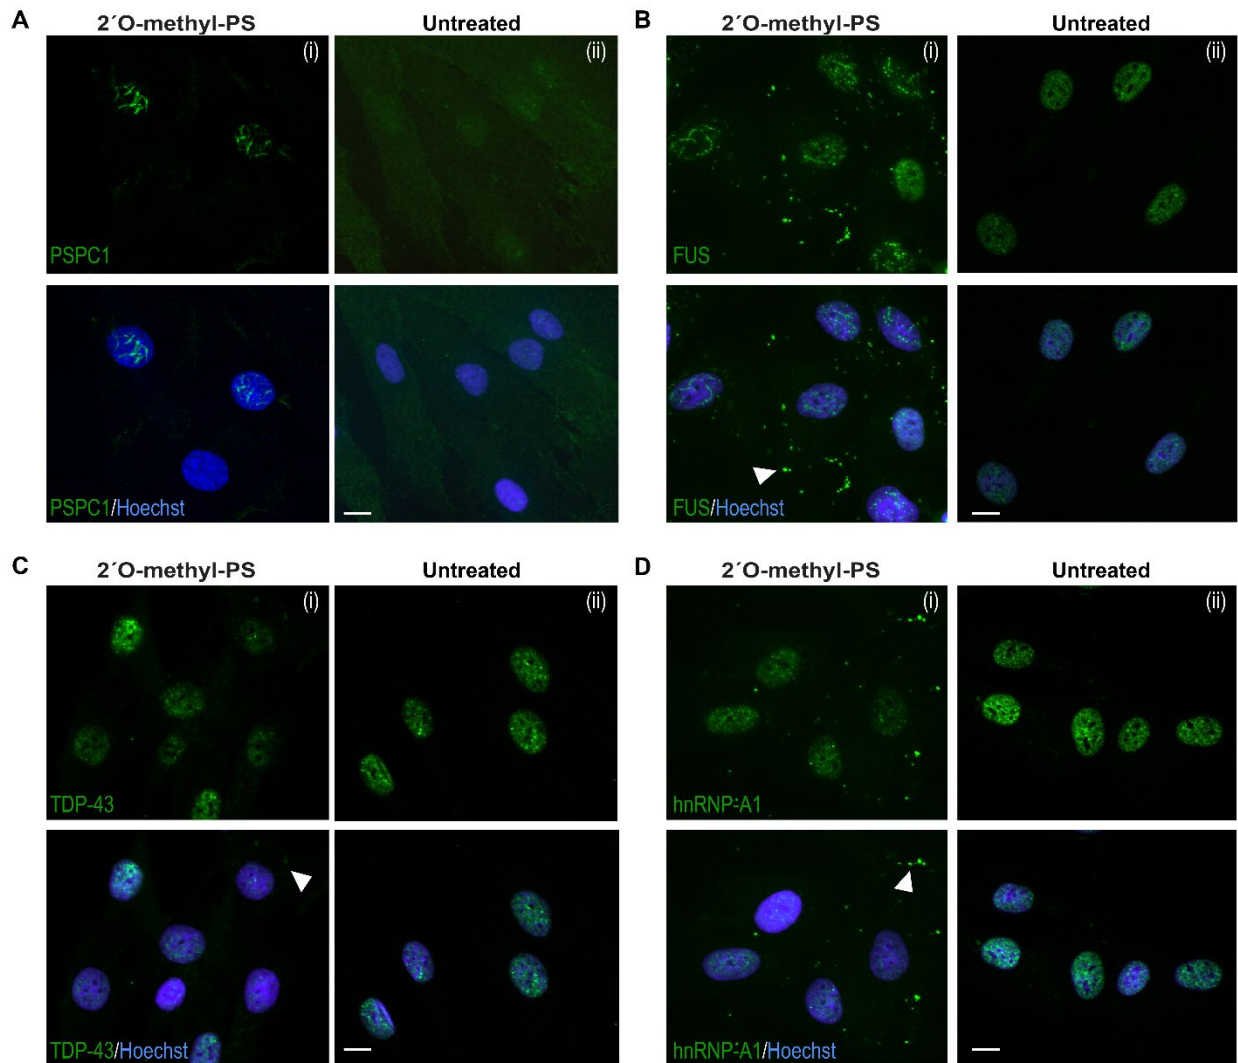

**Supplementary Figure S4 - Immunofluorescence staining of additional paraspeckle proteins following 2' O-methyl phosphorothioate *SMN7D(-10-29)* transfection (100 nM for 24 hours).** Showing (A) paraspeckle protein component 1 (PSPC1); (B) fused in sarcoma (FUS); (C) TAR-DNA binding protein 43 (TDP-43); and (D) heterogeneous nuclear ribonucleoprotein A1 (hnRNP-A1); in (i) 2' O-methyl transfected and (ii) untreated cells shown in each panel. The white arrows point to cytoplasmic protein accumulation. Scale bar = 10  $\mu$ m.

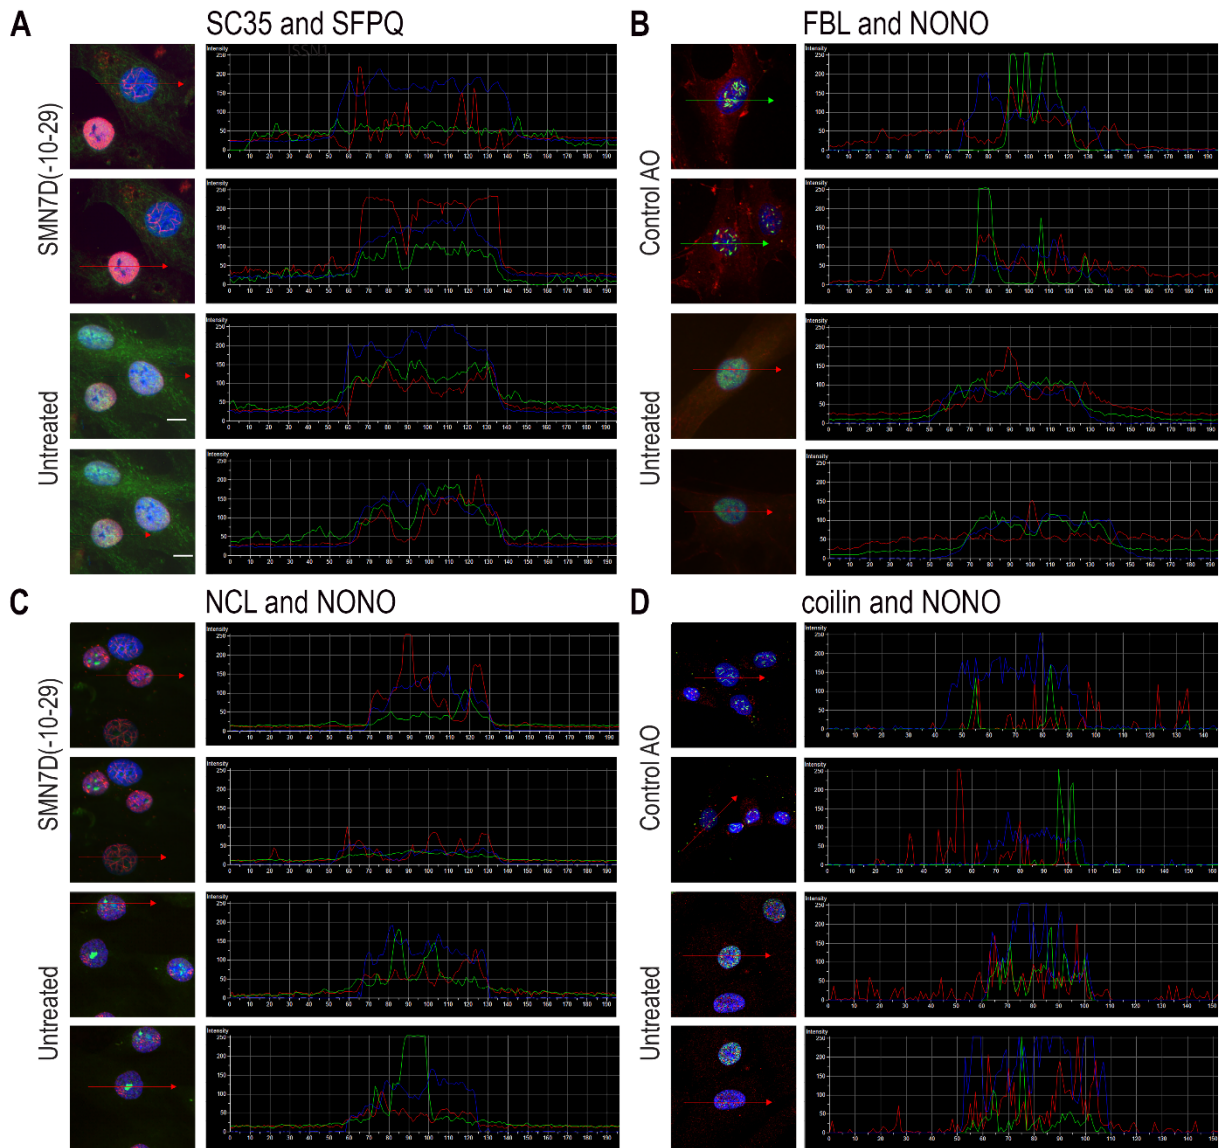

**Supplementary Figure S5 – Intensity profiling of immunofluorescent staining of paraspeckle proteins following transfection of the 2' O- methyl phosphorothioate AOs. Including, *SMN7D(-10-29)* (A, C) and the Control AO (B, D) (100 nM for 24 hours) and intensity profiling of selected cells showing (A) SFPQ (red) and SC35 (green); (B) NONO (green) and FBL (red); (C) SFPQ (red) and NCL (green); (D) NONO (green) and coilin (red).**



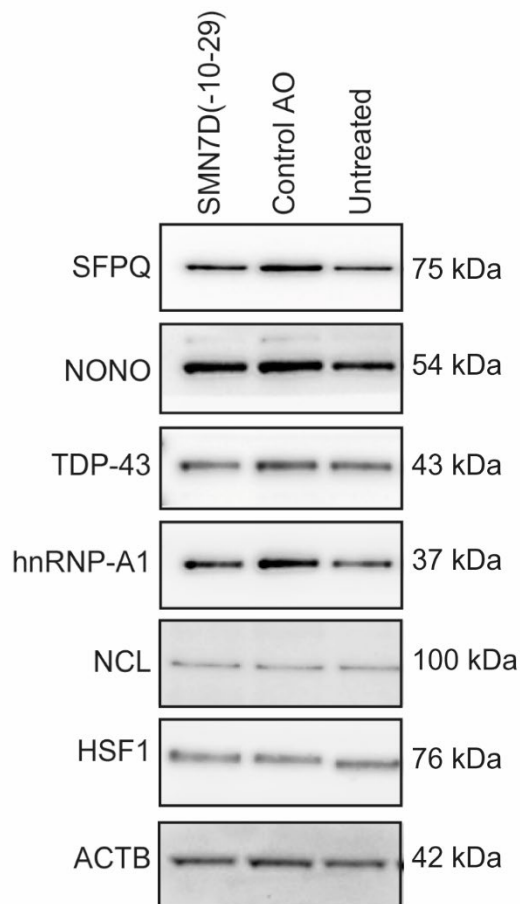

**Supplementary Figure S6 – Western blots following 2' O-methyl phosphorothioate AO transfection.** Western blots of extracts from cells transfected with the *SMN7D(-10-29)* and Control AOs (100 nM for 24 hours), probed with antibodies that recognize SFPQ, NONO, TDP-43, hnRNP-A1, NCL, HSF1 and ACTB (**Supplementary Table S2**).

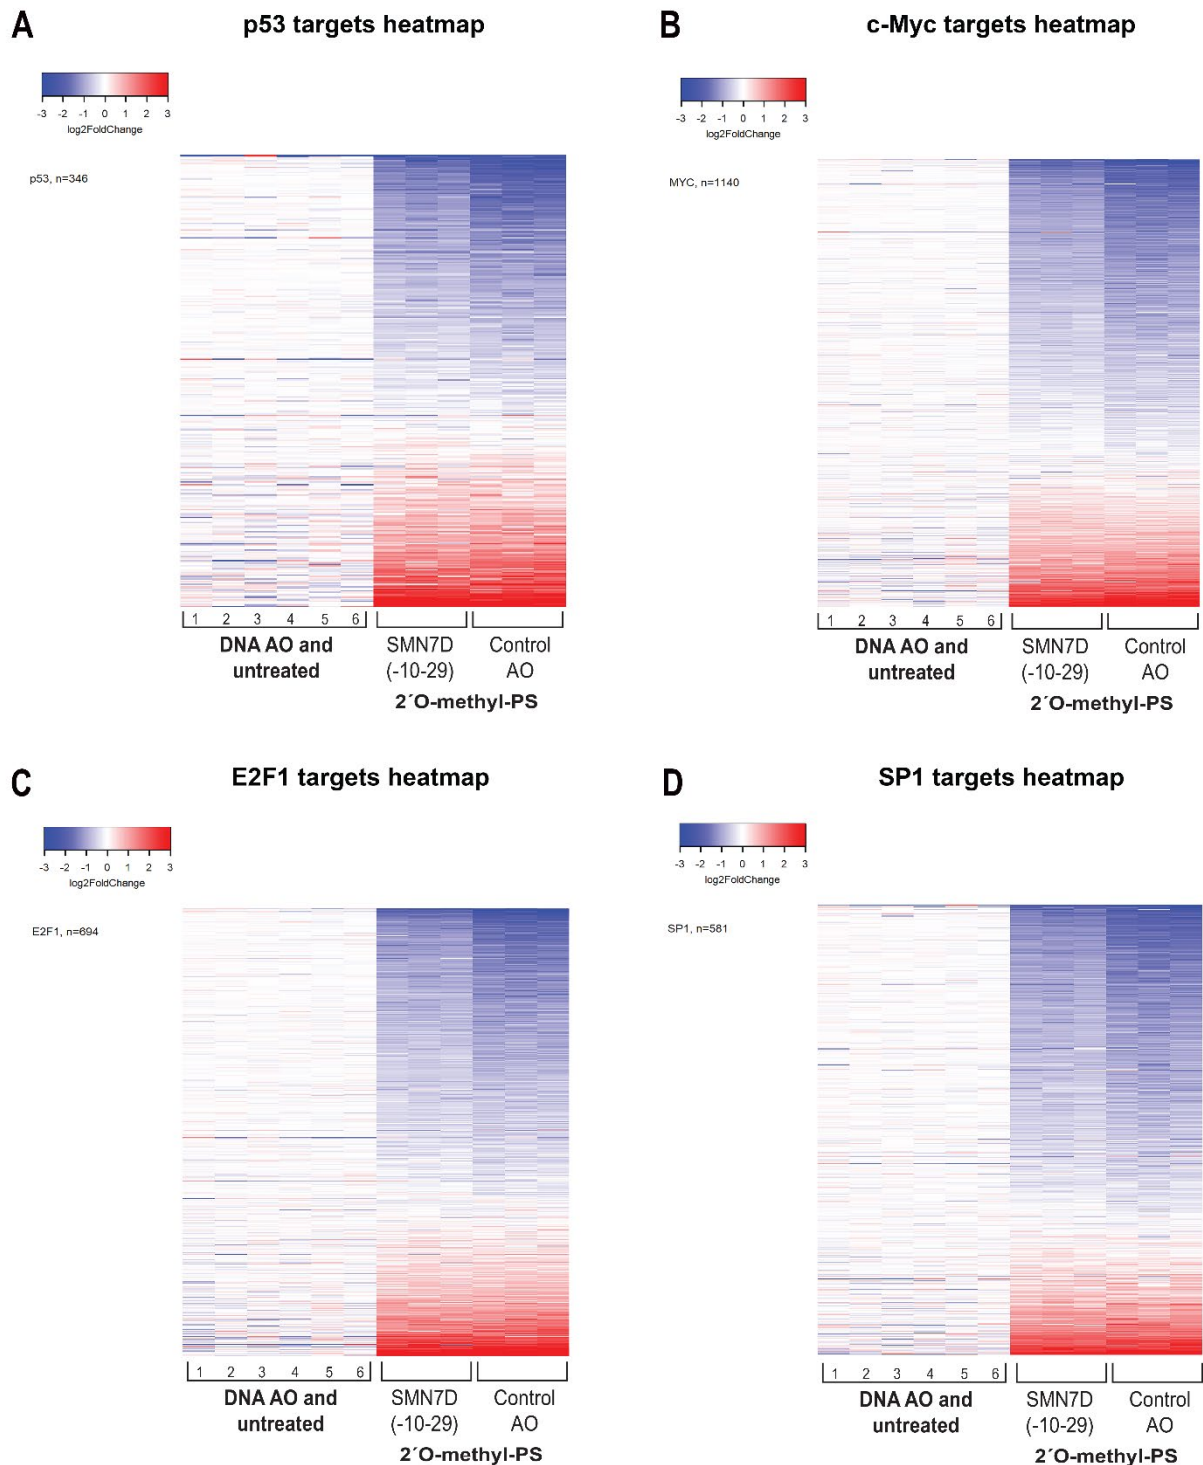

**Supplementary Figure S7 – RNAseq heatmaps following 2' O-methyl phosphorothioate AO transfection.** Showing heatmaps of transcripts regulated by the transcription factors involved in nucleolar stress response, p53 (A), c-Myc (B), E2F1 (C), and SP1 (D). The number of transcripts included in each heatmap is indicated.

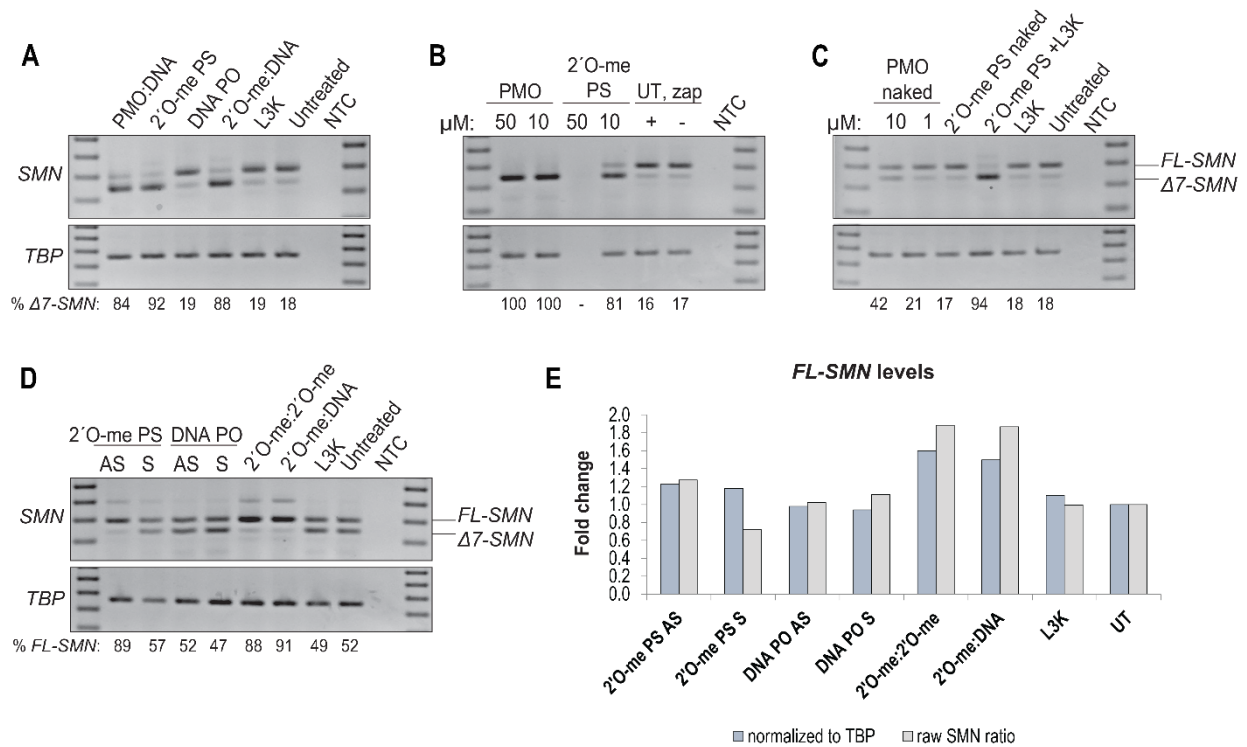

### Supplementary Figure S8 – Antisense effect of chemistries that do not induce nuclear inclusions.

Representative gel images of RT-PCRs across *SMN* and *TBP* following transfection with the following: **(A)** lipoplex transfection (100 nM) of *SMN7A(+13+32)* sequence as: annealed PMO:DNA leish duplex, 2' O-methyl phosphorothioate (PS) AO, DNA leish AO sequence (DNA PO) and annealed 2' O-methyl:DNA duplex using Lipofectamine 3000 (L3K), with the transfection incubated for 24 hours; **(B)** Neon electroporation (50 and 10 μM) of *SMN7A(+13+32)* sequence as PMO and 2' O-methyl PS chemistries, compared to untreated (UT) cells that underwent the Neon electroporation protocol (zap) and those that did not, and transfection incubated for 24 hours. The 2' O-methyl PS oligonucleotide ablated transcript expression; **(C)** gymnotic 'naked' oligonucleotide delivery of *SMN7A(+13+32)* sequence as a PMO (10 μM and 1 μM) and 2' O-methyl PS AO delivered naked (1 μM) and in a lipoplex (L3K, 100 nM) as a positive control for nuclear inclusions, and compared to L3K and untreated control cells, with transfection incubated for 72 hours. There were no viable cells for collection following transfection of the 2' O-methyl PS sequence at 10 μM for comparison to the PMO sequence; and **(D)** lipoplex transfection of annealed AOs (100 nM), showing the *SMN7D(-10-29)* antisense sequence and complementary sense sequence as 2' O-methyl PS and DNA PO AOs, annealed 2' O-me:2' O-me and 2' O-me:DNA sequences and compared to the L3K and untreated control cells, with transfection incubated for 24 hours. Normal human fibroblasts were used for **(A-C)**, with the percentage of exon 7 skipped transcripts (% Δ7-*SMN*) shown below each lane, and SMA fibroblasts were used for **(D)** with the percentage of full length *SMN* (% FL-*SMN*) transcripts shown below each lane. A no template control (NTC) was loaded in the final lane and a 100 bp marker used for size comparison; **(E)** graph showing the fold-change in FL-*SMN* levels as in **(D)**, displaying the data normalized to *TBP* and the raw *SMN* ratio, given that *TBP* expression was affected by transfection with phosphorothioate AOs.



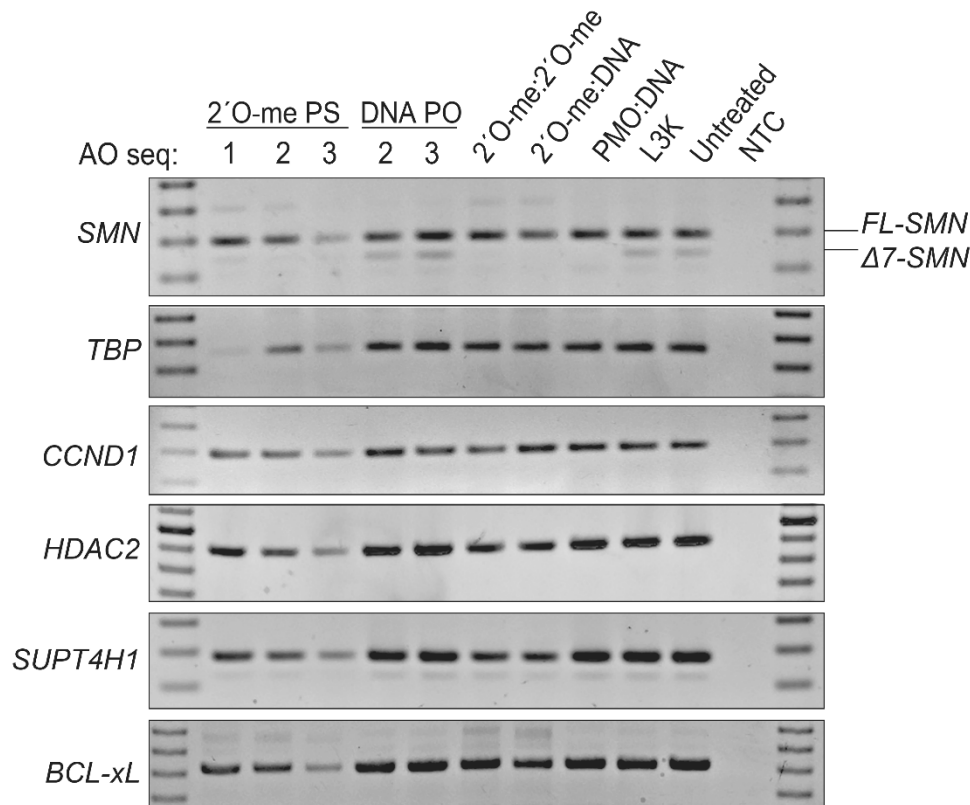

**Supplementary Figure S9 – Effect of 2' O-methyl phosphorothioate (2'O-me PS) AO induced nuclear inclusions on off-target transcript expression following transfection of normal fibroblasts with AO sequences as different chemistries.** Representative gel images of RT-PCRs across *SMN* (showing full length (FL) and exon 7 deleted ( $\Delta 7$ ) transcripts), *TBP*, *CCND1*, *HDAC2*, *SUPT4H1*, and *BCL-xL* transcripts following transfection with (1) the control sequence AO, (2) *SMN7D(-10-29)* antisense and (3) *SMN7D(-10-29)* sense sequences, synthesized as 2' O-methyl PS or DNA PO AOs, and as double stranded antisense/sense 2' O-me:2' O-me, 2' O-me:DNA and PMO:DNA AOs, compared to the lipofectamine 3000 (L3K) and untreated transfection controls. A no template control (NTC) was loaded in the final lane and a 100 bp marker used for size comparison.

**Supplementary Tables:****Supplementary Table S1** Primer sequences and PCR conditions used in this study.

| Primers        | Concentration/amount of primer per reaction | Sequence 5'-3'                                     | Temperature profile                                                                 |
|----------------|---------------------------------------------|----------------------------------------------------|-------------------------------------------------------------------------------------|
| <i>SMN</i>     | 25 ng                                       | AGGTCTCCTGGAAATAAATCAG<br>TGGTGTCATTTAGTGCTGCTCT   | 55°C 30 min<br>94°C 2 min<br>25 cycles:<br>94°C 40 sec<br>56°C 30 sec<br>68°C 1 min |
| <i>TBP</i>     | 25 ng                                       | AGCGCAAGGGTTTCTGGTTT<br>GGAGTCATGGGGGAGGGATA       | 55°C 30 min<br>94°C 2 min<br>24 cycles:<br>94°C 40 sec<br>56°C 30 sec<br>68°C 1 min |
| <i>BCL2</i>    | 25 ng                                       | AATGTCTCAGAGCAACCGGG<br>GGAGGGTAGAGTGGATGGT        | 55°C 30 min<br>94°C 2 min<br>25 cycles:<br>94°C 40 sec<br>60°C 30 sec<br>68°C 1 min |
| <i>CCND1</i>   | 25 ng                                       | TGTTTCGTGGCCTCTAAGATGAA<br>GTCCGGGTCACACTTGATCAC   | 55°C 30 min<br>94°C 2 min<br>23 cycles:<br>94°C 40 sec<br>60°C 30 sec<br>68°C 1 min |
| <i>HDAC2</i>   | 25 ng                                       | GCTGTCAATTTTCCAATGAG<br>CAGTCCATGCCAAAGTAGTAT      | 55°C 30 min<br>94°C 2 min<br>24 cycles:<br>94°C 40 sec<br>60°C 30 sec<br>68°C 1 min |
| <i>SUPT4H1</i> | 25 ng                                       | TTACTTCCTGCGGGTGCACA<br>CTGGATTTGTAGGCCACTCC       | 55°C 30 min<br>94°C 2 min<br>24 cycles:<br>94°C 40 sec<br>60°C 30 sec<br>68°C 1 min |
| <i>5S</i>      | 50 nM                                       | GGCCATACCACCCTGAACGC<br>CAGCACCCGGTATTCCCAGG       | 95 °C 20 sec<br>40 cycles<br>95 °C 3 sec<br>60 °C 30 sec                            |
| <i>18S</i>     | 250 nM                                      | GTAACCCGTTGAACCCATT<br>CCATCCAATCGGTAGTAGCG        |                                                                                     |
| <i>45S</i>     | 100 nM                                      | TGTCAGGCGTTCTCGTCTC<br>AGCACGACGTCACCACATC         |                                                                                     |
| <i>TBP</i>     | 500 nM                                      | TCAGGCGTTCGGTGGATCGAGT<br>AGTGATGCTGGGCACTGCGGAGAA |                                                                                     |
| <i>TUBB</i>    | 100 nM                                      | CTTCGGCCAGATCTTCAGAC<br>AGAGAGTGGGTCAGCTGGAA       |                                                                                     |

**Supplementary Table S2** Antibodies used in this study, indicating dilutions used, detection method and antibody validation.

| Protein    | Protein name                               | Supplier            | Catalogue # | Dilution |         | Conjugate | Validation                                                                                                                                                                                     |
|------------|--------------------------------------------|---------------------|-------------|----------|---------|-----------|------------------------------------------------------------------------------------------------------------------------------------------------------------------------------------------------|
|            |                                            |                     |             | IF       | WB      |           |                                                                                                                                                                                                |
| NONO       | Non-POU domain containing octamer          | Prepared in house   | NA          | 1:1000   | 1:10000 | mouse     | (Souquere, Beauclair et al. 2010)                                                                                                                                                              |
| SFPQ       | Splicing factor proline & glutamine rich   | Abcam               | Ab38148     | 1:1000   | 1:8000  | rabbit    | (Ke, Dramiga et al. 2012)                                                                                                                                                                      |
| PSPC1      | paraspeckle protein component 1            | Merck Millipore     | HPA038904   | 1:50     | NA      | mouse     | Antibodypedia<br>WB, ICC, IHC                                                                                                                                                                  |
| FUS        | Fused in sarcoma                           | Santa Cruz          | Sc-47711    | 1:500    | NA      | mouse     | Validated in SW480 cells<br>( <a href="https://datasheets.scbt.com/sc-47711.pdf">https://datasheets.scbt.com/sc-47711.pdf</a> )                                                                |
| TDP-43     | TAR-DNA binding protein 43                 | Protein Tech        | 10782-2-AP  | 1:300    | 1:3000  | rabbit    | Antibodypedia<br>WB, ICC, IHC                                                                                                                                                                  |
| hnRNP - A1 | Heterogeneous nuclear ribonucleoprotein A1 | Thermo Scientific   | PA5-19431   | 1:700    | 1:2000  | rabbit    | Antibodypedia<br>WB, IHC                                                                                                                                                                       |
| NCL        | Nucleolin                                  | Thermo Scientific   | 39-6400     | 1:250    | 1:2000  | mouse     | Antibodypedia<br>WB, ICC                                                                                                                                                                       |
| FBL        | Fibrillarin                                | Cell Signalling     | 2639        | 1:400    | NA      | rabbit    | Antibodypedia<br>WB, ICC                                                                                                                                                                       |
| COIL       | Coilin                                     | Sapphire Bioscience | GTX112570   | 1:250    | NA      | rabbit    | Validated in HeLa, HEPG2 and 293T cells, and in cell extracts<br>( <a href="http://www.genetex.com/Coilin-antibody-GTX112570.html">http://www.genetex.com/Coilin-antibody-GTX112570.html</a> ) |
| LMNB1      | Lamin B1                                   | Protein Tech        | 12987-1-AP  | 1:500    | NA      | rabbit    | Antibodypedia<br>WB, ICC, IHC                                                                                                                                                                  |
| SC35       | Splicing factor SC35                       | Merck Millipore     | 04-1550     | 1:1000   | NA      | mouse     | (Werwein, Dzuganova et al. 2013)                                                                                                                                                               |

|       |                                                       |                |               |       |         |        |                                                                                                                                                                                                                                                                                                |
|-------|-------------------------------------------------------|----------------|---------------|-------|---------|--------|------------------------------------------------------------------------------------------------------------------------------------------------------------------------------------------------------------------------------------------------------------------------------------------------|
| HSF1  | Heat shock factor 1                                   | Cell Signaling | 12972         | 1:400 | 1:500   | rabbit | Antibodypedia<br>WB, ICC, IHC                                                                                                                                                                                                                                                                  |
| TIA-1 | TIA1 cytotoxic granule associated RNA binding protein | Santa Cruz     | Sc-48371      | 1:100 | NA      | mouse  | (Mackenzie, Nicholson et al. 2017)                                                                                                                                                                                                                                                             |
| ACTB  | Beta actin                                            | Sigma          | A5441         | NA    | 1:60000 | mouse  | Validated in HS-68(WB), HeLa, JURKAT, COS7, NIH-3T3, PC-12, RAT2, CHO, MDBK, MDCK, FS-11 human fibroblast (ICC)<br><a href="https://www.sigmaaldrich.com/catalog/product/sigma/a5441?lang=en&amp;region=AU">https://www.sigmaaldrich.com/catalog/product/sigma/a5441?lang=en&amp;region=AU</a> |
| P53   | Tumor Protein 53                                      | Novocastra     | NCL-Lp53- D07 | NA    | 1:1000  | mouse  | (Horne, Anderson et al. 1996) (WB)                                                                                                                                                                                                                                                             |

## References:

Horne, G. M., J. J. Anderson, D. G. Tiniakos, G. G. McIntosh, M. D. Thomas, B. Angus, J. A. Henry, T. W. Lennard and C. H. Horne (1996). "p53 protein as a prognostic indicator in breast carcinoma: a comparison of four antibodies for immunohistochemistry." *Br J Cancer* **73**(1): 29-35.

Ke, Y. D., J. Dramiga, U. Schutz, J. J. Kril, L. M. Ittner, H. Schroder and J. Gotz (2012). "Tau-mediated nuclear depletion and cytoplasmic accumulation of SFPQ in Alzheimer's and Pick's disease." *PLoS One* **7**(4): e35678.

Mackenzie, I. R., A. M. Nicholson, M. Sarkar, J. Messing, M. D. Purice, C. Pottier, K. Annu, M. Baker, R. B. Perkinson, A. Kurti, B. J. Matchett, T. Mittag, J. Temirov, G. R. Hsiung, C. Krieger, M. E. Murray, M. Kato, J. D. Fryer, L. Petrucelli, L. Zinman, S. Weintraub, M. Mesulam, J. Keith, S. A. Zivkovic, V. Hirsch-Reinshagen, R. P. Roos, S. Zuchner, N. R. Graff-Radford, R. C. Petersen, R. J. Caselli, Z. K. Wszolek, E. Finger, C. Lippa, D. Lacomis, H. Stewart, D. W. Dickson, H. J. Kim, E. Rogaeva, E. Bigio, K. B. Boylan, J. P. Taylor and R. Rademakers (2017). "TIA1 Mutations in Amyotrophic Lateral Sclerosis and Frontotemporal Dementia Promote Phase Separation and Alter Stress Granule Dynamics." *Neuron* **95**(4): 808-816 e809.

Souquere, S., G. Beauclair, F. Harper, A. Fox and G. Pierron (2010). "Highly ordered spatial organization of the structural long noncoding NEAT1 RNAs within paraspeckle nuclear bodies." *Mol Biol Cell* **21**(22): 4020-4027.

Werwein, E., M. Dziganova, C. Usadel and K. H. Klempnauer (2013). "B-Myb switches from Cyclin/Cdk-dependent to Jnk- and p38 kinase-dependent phosphorylation and associates with SC35 bodies after UV stress." *Cell Death Dis* **4**: e511.

**Supplementary Table S3** Results of SFPQ immunostaining following transfection of fibroblasts with 2' O-methyl phosphorothioate AOs (100 nM, 24 hours). The nucleotide composition and length of each AO is indicated. Cells were stained for SFPQ and the percentages of cells with nuclear inclusions recorded, as was the percentage of cells showing cytoplasmic SFPQ aggregation.

| AO # | Nucleotide composition |    |    |    | Length | Cells with nuclear inclusions | Total cell number | SFPQ-nuclear inclusions (% cells) | Cytoplasmic SFPQ staining | Comments      |
|------|------------------------|----|----|----|--------|-------------------------------|-------------------|-----------------------------------|---------------------------|---------------|
|      | A                      | C  | G  | U  |        |                               |                   |                                   |                           |               |
| 1    | 4                      | 9  | 4  | 8  | 25     | 56                            | 56                | 100.0                             |                           |               |
| 2    | 5                      | 9  | 3  | 8  | 25     | 60                            | 60                | 100.0                             |                           |               |
| 3    | 3                      | 8  | 3  | 11 | 25     | 107                           | 109               | 98.2                              |                           |               |
| 4    | 4                      | 10 | 3  | 8  | 25     | 87                            | 89                | 97.8                              |                           |               |
| 5    | 4                      | 8  | 7  | 6  | 25     | 118                           | 121               | 97.5                              | >90%                      | 28% G content |
| 6    | 5                      | 11 | 4  | 5  | 25     | 95                            | 98                | 96.9                              |                           |               |
| 7    | 6                      | 7  | 8  | 4  | 25     | 29                            | 30                | 96.7                              |                           |               |
| 8    | 4                      | 9  | 3  | 9  | 25     | 112                           | 116               | 96.6                              |                           |               |
| 9    | 4                      | 7  | 3  | 11 | 25     | 76                            | 79                | 96.2                              |                           |               |
| 10   | 7                      | 2  | 7  | 9  | 25     | 70                            | 73                | 95.9                              |                           |               |
| 11   | 6                      | 2  | 3  | 14 | 25     | 128                           | 134               | 95.5                              |                           |               |
| 12   | 7                      | 8  | 3  | 7  | 25     | 63                            | 66                | 95.5                              |                           |               |
| 13   | 7                      | 7  | 3  | 8  | 25     | 55                            | 58                | 94.8                              |                           |               |
| 14   | 10                     | 10 | 5  | 2  | 27     | 78                            | 84                | 92.9                              |                           |               |
| 15   | 10                     | 7  | 2  | 6  | 25     | 130                           | 140               | 92.9                              |                           |               |
| 16   | 4                      | 9  | 2  | 9  | 24     | 122                           | 132               | 92.4                              |                           |               |
| 17   | 11                     | 3  | 9  | 7  | 30     | 101                           | 110               | 91.8                              |                           |               |
| 18   | 5                      | 10 | 4  | 6  | 25     | 52                            | 57                | 91.2                              |                           |               |
| 19   | 4                      | 6  | 8  | 7  | 25     | 29                            | 32                | 90.6                              |                           |               |
| 20   | 1                      | 12 | 0  | 12 | 25     | 33                            | 37                | 89.2                              |                           |               |
| 21   | 15                     | 2  | 3  | 2  | 22     | 44                            | 50                | 88.0                              |                           |               |
| 22   | 11                     | 3  | 10 | 2  | 26     | 109                           | 124               | 87.9                              | >90%                      | 38% G content |
| 23   | 6                      | 6  | 4  | 4  | 20     | 95                            | 111               | 85.6                              |                           |               |
| 24   | 7                      | 8  | 2  | 8  | 25     | 53                            | 63                | 84.1                              |                           |               |
| 25   | 4                      | 9  | 2  | 11 | 26     | 118                           | 142               | 83.1                              |                           |               |
| 26   | 7                      | 8  | 3  | 7  | 25     | 90                            | 109               | 82.6                              |                           |               |
| 27   | 5                      | 7  | 8  | 6  | 26     | 98                            | 119               | 82.4                              |                           |               |
| 28   | 3                      | 9  | 8  | 5  | 25     | 98                            | 120               | 81.7                              |                           |               |
| 29   | 3                      | 14 | 6  | 3  | 26     | 40                            | 50                | 80.0                              |                           |               |
| 30   | 3                      | 7  | 7  | 8  | 25     | 57                            | 72                | 79.2                              |                           |               |
| 31   | 0                      | 8  | 3  | 14 | 25     | 88                            | 113               | 77.9                              |                           |               |
| 32   | 6                      | 9  | 5  | 5  | 25     | 109                           | 140               | 77.9                              |                           |               |
| 33   | 18                     | 2  | 6  | 3  | 29     | 100                           | 129               | 77.5                              |                           |               |
| 34   | 6                      | 7  | 5  | 7  | 25     | 62                            | 81                | 76.5                              |                           |               |
| 35   | 3                      | 10 | 3  | 12 | 28     | 104                           | 136               | 76.5                              |                           |               |
| 36   | 14                     | 5  | 5  | 4  | 28     | 26                            | 35                | 74.3                              |                           |               |



| AO # | Nucleotide composition |    |    |    | Length | Cells with nuclear inclusions | Total cell number | SFPQ-nuclear inclusions (% cells) | Cytoplasmic SFPQ staining | Comments      |
|------|------------------------|----|----|----|--------|-------------------------------|-------------------|-----------------------------------|---------------------------|---------------|
|      | A                      | C  | G  | U  |        |                               |                   |                                   |                           |               |
| 37   | 3                      | 9  | 6  | 7  | 25     | 56                            | 77                | 72.7                              |                           |               |
| 38   | 10                     | 7  | 4  | 4  | 25     | 52                            | 72                | 72.2                              |                           |               |
| 39   | 9                      | 8  | 4  | 4  | 25     | 114                           | 159               | 71.7                              | >90%                      | 16% G content |
| 40   | 5                      | 7  | 5  | 8  | 25     | 77                            | 108               | 71.3                              |                           |               |
| 41   | 1                      | 9  | 4  | 4  | 18     | 72                            | 109               | 66.1                              |                           |               |
| 42   | 8                      | 4  | 9  | 4  | 25     | 83                            | 126               | 65.9                              | >90%                      | 36% G content |
| 43   | 3                      | 10 | 8  | 4  | 25     | 86                            | 131               | 65.6                              | >90%                      | 32% G content |
| 44   | 9                      | 3  | 10 | 3  | 25     | 75                            | 115               | 65.2                              | >90%                      | 40% G content |
| 45   | 8                      | 4  | 7  | 6  | 25     | 47                            | 74                | 63.5                              |                           |               |
| 46   | 6                      | 7  | 2  | 10 | 25     | 100                           | 158               | 63.3                              |                           |               |
| 47   | 10                     | 3  | 5  | 7  | 25     | 65                            | 103               | 63.1                              |                           |               |
| 48   | 7                      | 6  | 10 | 2  | 25     | 72                            | 115               | 62.6                              | >90%                      | 40% G content |
| 49   | 7                      | 7  | 8  | 11 | 33     | 25                            | 40                | 62.5                              |                           |               |
| 50   | 6                      | 4  | 8  | 2  | 20     | 83                            | 137               | 60.6                              | >90%                      | 40% G content |
| 51   | 6                      | 6  | 2  | 5  | 19     | 76                            | 128               | 59.4                              |                           |               |
| 52   | 4                      | 8  | 6  | 7  | 25     | 54                            | 93                | 58.1                              |                           |               |
| 53   | 1                      | 10 | 11 | 8  | 30     | 36                            | 62                | 58.1                              |                           |               |
| 54   | 2                      | 7  | 8  | 8  | 25     | 78                            | 138               | 56.5                              |                           |               |
| 55   | 6                      | 8  | 6  | 5  | 25     | 55                            | 100               | 55.0                              |                           |               |
| 56   | 7                      | 5  | 8  | 4  | 24     | 68                            | 125               | 54.4                              |                           |               |
| 57   | 8                      | 4  | 7  | 6  | 25     | 60                            | 112               | 53.6                              |                           |               |
| 58   | 5                      | 7  | 6  | 7  | 25     | 40                            | 77                | 51.9                              |                           |               |
| 59   | 6                      | 9  | 6  | 5  | 26     | 95                            | 187               | 50.8                              |                           |               |
| 60   | 8                      | 4  | 5  | 8  | 25     | 34                            | 67                | 50.7                              |                           |               |
| 61   | 6                      | 5  | 6  | 8  | 25     | 99                            | 207               | 47.8                              |                           |               |
| 62   | 6                      | 3  | 13 | 3  | 25     | 23                            | 49                | 46.9                              | >90%                      | 52% G content |
| 63   | 9                      | 4  | 9  | 3  | 25     | 41                            | 89                | 46.1                              | >90%                      | 36% G content |
| 64   | 8                      | 7  | 7  | 3  | 25     | 55                            | 121               | 45.5                              |                           |               |
| 65   | 6                      | 1  | 6  | 11 | 24     | 65                            | 146               | 44.5                              |                           |               |
| 66   | 3                      | 7  | 8  | 7  | 25     | 57                            | 134               | 42.5                              |                           |               |
| 67   | 11                     | 9  | 3  | 8  | 31     | 44                            | 104               | 42.3                              |                           |               |
| 68   | 3                      | 10 | 7  | 5  | 25     | 22                            | 55                | 40.0                              |                           |               |
| 69   | 6                      | 7  | 9  | 3  | 25     | 48                            | 122               | 39.3                              | >90%                      | 36% G content |
| 70   | 2                      | 9  | 13 | 1  | 25     | 43                            | 114               | 37.7                              | >90%                      | 52% G content |
| 71   | 2                      | 7  | 6  | 4  | 19     | 45                            | 123               | 36.6                              |                           |               |
| 72   | 6                      | 7  | 9  | 3  | 25     | 36                            | 104               | 34.6                              |                           |               |
| 73   | 5                      | 6  | 3  | 0  | 14     | 45                            | 132               | 34.1                              |                           |               |
| 74   | 9                      | 7  | 5  | 4  | 25     | 30                            | 90                | 33.3                              |                           |               |
| 75   | 6                      | 3  | 7  | 9  | 25     | 29                            | 88                | 33.0                              | >90%                      | 36% G content |
| 76   | 5                      | 10 | 8  | 2  | 25     | 52                            | 160               | 32.5                              |                           |               |
| 77   | 5                      | 6  | 4  | 5  | 20     | 17                            | 59                | 28.8                              |                           |               |
| 78   | 6                      | 6  | 8  | 1  | 21     | 33                            | 115               | 28.7                              |                           |               |

| AO # | Nucleotide composition |    |    |   | Length | Cells with nuclear inclusions | Total cell number | SFPQ-nuclear inclusions (% cells) | Cytoplasmic SFPQ staining | Comments                                             |
|------|------------------------|----|----|---|--------|-------------------------------|-------------------|-----------------------------------|---------------------------|------------------------------------------------------|
|      | A                      | C  | G  | U |        |                               |                   |                                   |                           |                                                      |
| 79   | 5                      | 6  | 7  | 7 | 25     | 33                            | 117               | <b>28.2</b>                       |                           |                                                      |
| 80   | 3                      | 8  | 5  | 9 | 25     | 39                            | 143               | <b>27.3</b>                       |                           |                                                      |
| 81   | 3                      | 5  | 12 | 5 | 25     | 26                            | 96                | <b>27.1</b>                       | >90%                      | 48% G content                                        |
| 82   | 7                      | 8  | 7  | 3 | 25     | 21                            | 78                | <b>26.9</b>                       |                           |                                                      |
| 83   | 6                      | 4  | 9  | 6 | 25     | 32                            | 122               | <b>26.2</b>                       | >90%                      | 36% G content                                        |
| 84   | 4                      | 10 | 6  | 5 | 25     | 40                            | 156               | <b>25.6</b>                       |                           |                                                      |
| 85   | 4                      | 5  | 9  | 5 | 23     | 15                            | 134               | <b>11.2</b>                       | >90%                      | 39% G content                                        |
| 86   | 4                      | 3  | 8  | 4 | 19     | 10                            | 138               | <b>7.2</b>                        | >90%                      | 42% G content                                        |
| 87   | 2                      | 4  | 11 | 8 | 25     | 8                             | 146               | <b>5.5</b>                        | >90%                      | 44% G content                                        |
| 88   | 6                      | 6  | 12 | 3 | 27     | 3                             | 169               | <b>1.8</b>                        | >90%                      | 44% G content                                        |
| 89   | 9                      | 4  | 11 | 1 | 25     | 2                             | 161               | <b>1.2</b>                        | >90%                      | 44% G content                                        |
| 90   | 3                      | 4  | 12 | 6 | 25     | 0                             | 85                | <b>0.0</b>                        |                           | 25% of cells show SFPQ localised to nuclear envelope |
| UT 1 |                        |    |    |   |        | 0                             | 122               | <b>0.0</b>                        |                           |                                                      |
| UT 2 |                        |    |    |   |        | 0                             | 85                | <b>0.0</b>                        |                           |                                                      |

**Supplementary Table S4** GO Terms for Genes showing altered expression in 2' O-methyl phosphorothioate antisense oligonucleotide transfected cells**UPREGULATED GENE EXPRESSION**

| <b>NEGATIVE REGULATION OF CAMP SIGNALLING</b>                                    | <b>size</b> | <b>NES</b> | <b>pvalue</b> | <b>FDR</b>  |
|----------------------------------------------------------------------------------|-------------|------------|---------------|-------------|
| GO_ADENYLATE_CYCLASE_INHIBITING_G_PROTEIN_COUPL<br>ED_RECEPTOR_SIGNALING_PATHWAY | 67          | 1.4033092  | 0.001002004   | 0.09743188  |
| GO_CAMP_METABOLIC_PROCESS                                                        | 34          | 1.4328331  | 0.011077543   | 0.0764675   |
| GO_NEGATIVE_REGULATION_OF_CYCLIC_NUCLEOTIDE_ME<br>TABOLIC_PROCESS                | 42          | 1.4055219  | 0.01002004    | 0.09573191  |
| GO_ACTIVATION_OF_PROTEIN_KINASE_A_ACTIVITY                                       | 17          | -1.6124529 | 0             | 0.026522638 |
| <b>STAT3 CASCADE</b>                                                             | <b>size</b> | <b>NES</b> | <b>pvalue</b> | <b>FDR</b>  |
| GO_REGULATION_OF_TYROSINE_PHOSPHORYLATION_OF_S<br>TAT3_PROTEIN                   | 44          | 1.4635448  | 0.004024145   | 0.057533268 |
| GO_POSITIVE_REGULATION_OF_TYROSINE_PHOSPHORYLA<br>TION_OF_STAT3_PROTEIN          | 37          | 1.5350006  | 0             | 0.02592797  |
| GO_POSITIVE_REGULATION_OF_STAT_CASCADE                                           | 72          | 1.4300276  | 0.002         | 0.078029625 |
| GO_REGULATION_OF_TYROSINE_PHOSPHORYLATION_OF_S<br>TAT1_PROTEIN                   | 16          | 1.4674374  | 0.026041666   | 0.05570127  |
| <b>CHROMATIN SILENCING</b>                                                       | <b>size</b> | <b>NES</b> | <b>pvalue</b> | <b>FDR</b>  |
| GO_PROTEIN_HETEROTETRAMERIZATION                                                 | 37          | 1.5180206  | 0.001004016   | 3.24E-02    |
| GO_NEGATIVE_REGULATION_OF_MEGAKARYOCYTE_DIFFER<br>ENTIATION                      | 18          | 1.4655974  | 0.018480493   | 0.05672158  |
| GO_NEGATIVE_REGULATION_OF_HEMATOPOIETIC_PROGEN<br>ITOR_CELL_DIFFERENTIATION      | 24          | 1.4251298  | 0.02123357    | 0.08160915  |
| GO_CHROMATIN_SILENCING                                                           | 93          | 1.5536975  | 0             | 0.020343194 |
| GO_CHROMATIN_SILENCING_AT_RDNA                                                   | 37          | 1.6677153  | 0             | 0.002782914 |
| GO_NEGATIVE_REGULATION_OF_GENE_EXPRESSION_EPIG<br>ENETIC                         | 110         | 1.5046362  | 0             | 0.0375754   |
| GO_CENTROMERE_COMPLEX_ASSEMBLY                                                   | 43          | 1.4221992  | 0.002004008   | 0.08319024  |

|                                                      |     |           |   |             |
|------------------------------------------------------|-----|-----------|---|-------------|
| GO_CHROMATIN_ASSEMBLY_OR_DISASSEMBLY                 | 168 | 1.4074483 | 0 | 0.09356921  |
| GO_DNA_PACKAGING                                     | 184 | 1.4209635 | 0 | 0.08399753  |
| GO_DNA_REPLICATION_DEPENDENT_NUCLEOSOME_ORGANIZATION | 32  | 1.6551554 | 0 | 0.003492132 |

**DOWNREGULATED GENE EXPRESSION**

| <b>MEMBRANE AND ORGANELLE ORGANISATION</b>                                                   | <b>size</b> | <b>NES</b> | <b>pvalue</b> | <b>FDR</b>  |
|----------------------------------------------------------------------------------------------|-------------|------------|---------------|-------------|
| GO_MULTIVESICULAR_BODY_ORGANIZATION                                                          | 30          | -2.6878452 | 0             | 0           |
| GO_REGULATION_OF_EXOSOMAL_SECRETION                                                          | 17          | -1.4602777 | 0.030303031   | 0.054562636 |
| GO_MULTI_ORGANISM_MEMBRANE_ORGANIZATION                                                      | 29          | -2.1695724 | 0             | 0.00119111  |
| GO_CELL_SEPARATION_AFTER_CYTOKINESIS                                                         | 17          | -1.704032  | 0             | 0.018966021 |
| GO_MEMBRANE_BUDDING                                                                          | 110         | -2.8605185 | 0             | 0           |
| GO_VIRION_ASSEMBLY                                                                           | 36          | -2.6067855 | 0             | 0           |
| GO_UBIQUITIN_DEPENDENT_PROTEIN_CATABOLIC_PROCESS_VIA_THE_MULTIVESICULAR_BODY_SORTING_PATHWAY | 16          | -1.8037659 | 0             | 0.01173263  |
| GO_MULTI_ORGANISM_ORGANELLE_ORGANIZATION                                                     | 23          | -2.6754305 | 0             | 0           |
| <b>NEGATIVE REGULATION OF AUTOPHAGY</b>                                                      |             |            |               |             |
| <b>GO_NEGATIVE_REGULATION_OF_AUTOPHAGY</b>                                                   | <b>size</b> | <b>NES</b> | <b>pvalue</b> | <b>FDR</b>  |
| GO_NEGATIVE_REGULATION_OF_AUTOPHAGY                                                          | 51          | -1.8540518 | 0             | 0.009771321 |
| GO_NEGATIVE_REGULATION_OF_ORGANELLE_ASSEMBLY                                                 | 22          | -1.4039384 | 0             | 0.0703511   |
| GO_REGULATION_OF_AUTOPHAGOSOME_ASSEMBLY                                                      | 34          | -2.414632  | 0             | 2.78E-04    |
| GO_NEGATIVE_REGULATION_OF_RESPONSE_TO_EXTRACELLULAR_STIMULUS                                 | 33          | -1.4719748 | 0             | 0.051657468 |
| GO_REGULATION_OF_VACUOLE_ORGANIZATION                                                        | 40          | -1.9451795 | 0             | 0.006435364 |
| GO_NEGATIVE_REGULATION_OF_MACROAUTOPHAGY                                                     | 20          | -2.5849924 | 0             | 0           |
| <b>NUCLEOTIDE EXCISION REPAIR</b>                                                            |             |            |               |             |
| <b>GO_GLOBAL_GENOME_NUCLEOTIDE_EXCISION_REPAIR</b>                                           | <b>size</b> | <b>NES</b> | <b>pvalue</b> | <b>FDR</b>  |
| GO_GLOBAL_GENOME_NUCLEOTIDE_EXCISION_REPAIR                                                  | 32          | -2.953256  | 0             | 0           |
| GO_NUCLEOTIDE_EXCISION_REPAIR_DNA_DAMAGE_RECOGNITION                                         | 23          | -3.7156785 | 0             | 0           |

|                                                                                                      |             |            |               |             |
|------------------------------------------------------------------------------------------------------|-------------|------------|---------------|-------------|
| GO_NUCLEOTIDE_EXCISION_REPAIR_DNA_INCISION                                                           | 39          | -2.1080408 | 0             | 0.002141136 |
| GO_NUCLEOTIDE_EXCISION_REPAIR_DNA_DUPLEX_UNWINDING                                                   | 22          | -3.3069005 | 0             | 0           |
| GO_NUCLEOTIDE_EXCISION_REPAIR_PREINCISION_COMPLEX_ASSEMBLY                                           | 29          | -2.947477  | 0             | 0           |
| GO_NUCLEOTIDE_EXCISION_REPAIR_PREINCISION_COMPLEX_STABILIZATION                                      | 21          | -3.1554484 | 0             | 0           |
| <b>PROTEIN TRANSMEMBRANE TRANSPORT</b>                                                               |             |            |               |             |
|                                                                                                      | <b>size</b> | <b>NES</b> | <b>pvalue</b> | <b>FDR</b>  |
| GO_MITOCHONDRIAL_TRANSMEMBRANE_TRANSPORT                                                             | 37          | -1.6415616 | 0             | 0.023881914 |
| GO_PEROXISOME_ORGANIZATION                                                                           | 33          | -3.12492   | 0             | 0           |
| GO_PROTEIN_TRANSMEMBRANE_TRANSPORT                                                                   | 49          | -1.6217597 | 0             | 0.025787786 |
| GO_PEROXISOMAL_TRANSPORT                                                                             | 18          | -2.0793462 | 0             | 0.002849037 |
| GO_PROTEIN_TARGETING_TO_MITOCHONDRION                                                                | 46          | -1.5986532 | 0             | 0.028202297 |
| <b>NEGATIVE REGULATION OF INTRINSIC APOPTOSIS</b>                                                    |             |            |               |             |
|                                                                                                      | <b>size</b> | <b>NES</b> | <b>pvalue</b> | <b>FDR</b>  |
| GO_NEGATIVE_REGULATION_OF_ENDOPLASMIC_RETICULUM_STRESS_INDUCED_INTRINSIC_APOPTOTIC_SIGNALING_PATHWAY | 17          | -2.4685698 | 0             | 0           |
| GO_PROTEIN_EXIT_FROM_ENDOPLASMIC_RETICULUM                                                           | 18          | -3.2342908 | 0             | 0           |
| GO_REGULATION_OF_ENDOPLASMIC_RETICULUM_STRESS_INDUCED_INTRINSIC_APOPTOTIC_SIGNALING_PATHWAY          | 28          | -1.5667129 | 0             | 0.03213714  |
| GO_REGULATION_OF_ERAD_PATHWAY                                                                        | 27          | -2.0681918 | 0             | 0.003088701 |
| GO_ENDOPLASMIC_RETICULUM_TO_CYTOSOL_TRANSPORT                                                        | 21          | -1.874271  | 0             | 0.008970704 |
| GO_ER_ASSOCIATED_UBIQUITIN_DEPENDENT_PROTEIN_CATABOLIC_PROCESS                                       | 58          | -3.2112198 | 0             | 0           |
| GO_NEGATIVE_REGULATION_OF_RESPONSE_TO_ENDOPLASMIC_RETICULUM_STRESS                                   | 35          | -2.1436315 | 0             | 0.001386112 |
| GO_REGULATION_OF_PROTEIN_EXIT_FROM_ENDOPLASMIC_RETICULUM                                             | 18          | -1.8251425 | 0             | 0.010902868 |



**Supplementary Table S5** Select genes that are differentially expressed following transfection with phosphorothioate AOs,  $p$ -adj<0.05

| <i>Gene Function</i>                 | <i>Gene</i>      | <i>baseMean</i> | <i>log2FoldChange</i> | <i>lfcSE</i> | <i>stat</i> | <i>pvalue</i> | <i>padj</i> |
|--------------------------------------|------------------|-----------------|-----------------------|--------------|-------------|---------------|-------------|
| Paraspeckle formation                | <i>NONO</i>      | 6814.6533       | -1.605590056          | 0.064551     | -24.8734    | 1.45E-136     | 1.33E-134   |
|                                      | <i>SFPQ</i>      | 6086.05841      | -0.245044029          | 0.037328     | -6.56456    | 5.22E-11      | 2.52E-10    |
|                                      | <i>PSPC1</i>     | 933.5484        | 0.52539659            | 0.115657     | 4.54272     | 5.55E-06      | 1.73E-05    |
|                                      | <i>HNRNPA1</i>   | 23097.6534      | -0.875714943          | 0.043203     | -20.2697    | 2.38E-91      | 1.02E-89    |
| Long non-coding RNAs                 | <i>NEAT1</i>     | 28289.7185      | 0.10944579            | 0.04473033   | 2.44679119  | 0.01441343    | 0.02555364  |
|                                      | <i>MALAT1</i>    | 13988.0571      | 1.36100169            | 0.08989247   | 15.1403301  | 8.78E-52      | 1.68E-50    |
| Housekeeping genes                   | <i>ACTB</i>      | 17858.7484      | -1.644129341          | 0.070272     | -23.3968    | 4.61E-121     | 3.34E-119   |
|                                      | <i>GAPDH</i>     | 75225.3041      | -1.508429767          | 0.06004      | -25.1237    | 2.74E-139     | 2.67E-137   |
|                                      | <i>LMNA</i>      | 35516.4004      | -1.190850219          | 0.118312     | -10.0653    | 7.86E-24      | 6.77E-23    |
|                                      | <i>TUBB</i>      | 26558.6187      | -1.504779123          | 0.054218     | -27.7543    | 1.55E-169     | 2.59E-167   |
| ALS/neurodegenerative disease linked | <i>CCND1</i>     | 7899.31335      | 1.501003895           | 0.147043     | 10.20795    | 1.83E-24      | 1.62E-23    |
|                                      | <i>TARDBP</i>    | 3241.25009      | -1.085496089          | 0.123341     | -8.80079    | 1.36E-18      | 9.65E-18    |
|                                      | <i>SOD1</i>      | 3081.30977      | -1.635554126          | 0.054046     | -30.262     | 3.62E-201     | 1.02E-198   |
|                                      | <i>SQSTM1</i>    | 26827.0606      | -1.014363155          | 0.08889      | -11.4115    | 3.67E-30      | 3.88E-29    |
|                                      | <i>NEK1</i>      | 1221.97681      | -1.023991002          | 0.111042     | -9.22166    | 2.93E-20      | 2.22E-19    |
|                                      | <i>SFPQ</i>      | 6086.05841      | -0.245044029          | 0.037328     | -6.56456    | 5.22E-11      | 2.52E-10    |
|                                      | <i>HNRNPA1</i>   | 23097.6534      | -0.875714943          | 0.043203     | -20.2697    | 2.38E-91      | 1.02E-89    |
|                                      | <i>VCP</i>       | 8459.1865       | -1.131364753          | 0.06775      | -16.6991    | 1.33E-62      | 3.23E-61    |
| Regulation of autophagy              | <i>BECN1</i>     | 1813.02266      | -0.975523569          | 0.06613      | -14.7517    | 3.00E-49      | 5.39E-48    |
|                                      | <i>LAMP2</i>     | 6554.77054      | -2.07196222           | 0.080585     | -25.7115    | 8.69E-146     | 9.59E-144   |
|                                      | <i>MAP1LC3B2</i> | 27.3430712      | 1.580493242           | 0.654944     | 2.413173    | 0.015814298   | 0.027771015 |
|                                      | <i>ATG4A</i>     | 388.318602      | -0.963138891          | 0.097783     | -9.8498     | 6.87E-23      | 5.74E-22    |
|                                      | <i>ATG4B</i>     | 1409.18523      | -1.081389304          | 0.113684     | -9.51223    | 1.87E-21      | 1.48E-20    |
|                                      | <i>ATG4C</i>     | 301.842951      | -2.053143566          | 0.166816     | -12.3078    | 8.22E-35      | 1.01E-33    |
| Mitochondrial genes                  | <i>PINK1</i>     | 1938.70279      | -1.622947881          | 0.064272     | -25.2514    | 1.09E-140     | 1.08E-138   |
|                                      | <i>OMA1</i>      | 447.345587      | -1.036980543          | 0.122901     | -8.4375     | 3.24E-17      | 2.18E-16    |
|                                      | <i>TOMM7</i>     | 1922.14858      | -1.583279452          | 0.092241     | -17.1646    | 4.89E-66      | 1.27E-64    |
|                                      | <i>TOMM20</i>    | 3854.23598      | -0.988688218          | 0.043732     | -22.6079    | 3.62E-113     | 2.33E-111   |
|                                      | <i>OPA1</i>      | 1447.40171      | -0.90932172           | 0.069156     | -13.1488    | 1.73E-39      | 2.42E-38    |

| Gene Function          | Gene           | baseMean   | log2FoldChange | lfcSE    | stat     | pvalue      | padj        |
|------------------------|----------------|------------|----------------|----------|----------|-------------|-------------|
| Chromatin regulators   | <i>PRDX3</i>   | 2235.39048 | -1.55696596    | 0.089438 | -17.4083 | 7.14E-68    | 1.93E-66    |
|                        | <i>NDUFS1</i>  | 2307.52968 | -0.783666494   | 0.055681 | -14.0743 | 5.47E-45    | 8.82E-44    |
|                        | <i>CHD2</i>    | 9845.30805 | 1.395002402    | 0.10683  | 13.05814 | 5.71E-39    | 7.88E-38    |
|                        | <i>CHD3</i>    | 4659.65126 | -0.972508898   | 0.171684 | -5.66454 | 1.47E-08    | 5.90E-08    |
|                        | <i>CHD4</i>    | 73.2413445 | -0.924334767   | 0.266846 | -3.46393 | 0.000532354 | 0.001256052 |
|                        | <i>CHD5</i>    | 110.708368 | 1.668235463    | 0.295975 | 5.6364   | 1.74E-08    | 6.91E-08    |
|                        | <i>CHD6</i>    | 2140.10813 | -0.836570193   | 0.098323 | -8.50836 | 1.76E-17    | 1.20E-16    |
|                        | <i>CHD7</i>    | 244.587533 | 0.778307314    | 0.187961 | 4.140802 | 3.46E-05    | 9.75E-05    |
|                        | <i>BRD7</i>    | 1423.56572 | -0.755449285   | 0.080551 | -9.37855 | 6.69E-21    | 5.20E-20    |
|                        | <i>RSF1</i>    | 1548.89327 | -0.739313131   | 0.116281 | -6.35801 | 2.04E-10    | 9.48E-10    |
| SRSF splicing factors  | <i>PRMT2</i>   | 2829.44457 | -1.851853336   | 0.06107  | -30.3232 | 5.67E-202   | 1.63E-199   |
|                        | <i>ATM</i>     | 3402.86124 | -0.909411474   | 0.152626 | -5.95842 | 2.55E-09    | 1.09E-08    |
|                        | <i>SRSF5</i>   | 4001.59255 | -0.850527896   | 0.061477 | -13.835  | 1.57E-43    | 2.44E-42    |
|                        | <i>SRSF7</i>   | 2358.80632 | 1.14924152     | 0.088445 | 12.99382 | 1.33E-38    | 1.81E-37    |
|                        | <i>SRSF9</i>   | 1806.30131 | -1.178033031   | 0.098895 | -11.9119 | 1.03E-32    | 1.19E-31    |
|                        | <i>SRSF11</i>  | 4883.40282 | -1.015711402   | 0.060073 | -16.908  | 3.93E-64    | 9.77E-63    |
|                        | <i>SRSF12</i>  | 28.2567659 | 1.990821281    | 0.441186 | 4.512433 | 6.41E-06    | 1.98E-05    |
| hnRNP splicing factors | <i>HNRNPA0</i> | 2403.48685 | -1.205722935   | 0.051636 | -23.3502 | 1.37E-120   | 9.78E-119   |
|                        | <i>HNRNPA1</i> | 23097.6534 | -0.875714943   | 0.043203 | -20.2697 | 2.38E-91    | 1.02E-89    |
|                        | <i>HNRNPA3</i> | 6190.9897  | -0.809492026   | 0.049872 | -16.2312 | 3.03E-59    | 6.86E-58    |
|                        | <i>HNRNPC</i>  | 9339.52659 | -0.909265261   | 0.09021  | -10.0794 | 6.81E-24    | 5.88E-23    |
|                        | <i>HNRNPD</i>  | 4261.0317  | -0.707086349   | 0.071658 | -9.86747 | 5.76E-23    | 4.83E-22    |
|                        | <i>HNRNPH1</i> | 9072.23317 | -0.818582115   | 0.06308  | -12.9769 | 1.65E-38    | 2.25E-37    |
|                        | <i>HNRNPH2</i> | 1920.93719 | -1.309220659   | 0.068468 | -19.1215 | 1.67E-81    | 5.98E-80    |
|                        | <i>HNRNPK</i>  | 14247.3337 | -0.904650207   | 0.047333 | -19.1124 | 1.99E-81    | 7.10E-80    |
|                        | <i>HNRNPM</i>  | 3978.32117 | -1.017471725   | 0.069193 | -14.7048 | 6.01E-49    | 1.08E-47    |
|                        | <i>HNRNPU</i>  | 9355.26679 | -0.729289831   | 0.052105 | -13.9965 | 1.64E-44    | 2.62E-43    |
| PRPF splicing factors  | <i>PRPF4B</i>  | 2099.39047 | -0.734130085   | 0.085553 | -8.58096 | 9.41E-18    | 6.46E-17    |
|                        | <i>PRPF6</i>   | 2011.10598 | -1.414788414   | 0.067575 | -20.9366 | 2.48E-97    | 1.20E-95    |
|                        | <i>PRPF8</i>   | 8289.29802 | -0.778149686   | 0.092561 | -8.40686 | 4.21E-17    | 2.81E-16    |
|                        | <i>PRPF19</i>  | 1779.67526 | -1.08301036    | 0.17801  | -6.08398 | 1.17E-09    | 5.15E-09    |

| Gene Function         | Gene             | baseMean    | log2FoldChange | lfcSE       | stat     | pvalue      | padj        |
|-----------------------|------------------|-------------|----------------|-------------|----------|-------------|-------------|
| HDAC family           | <i>PRPF31</i>    | 1199.46733  | -0.796257916   | 0.141759    | -5.61699 | 1.94E-08    | 7.70E-08    |
|                       | <i>PRPF38A</i>   | 852.021328  | -0.917161319   | 0.08627     | -10.6313 | 2.13E-26    | 2.00E-25    |
|                       | <i>PRPF40A</i>   | 2777.59937  | -0.725634522   | 0.12483     | -5.81296 | 6.14E-09    | 2.54E-08    |
|                       | <i>PRPF40B</i>   | 513.828913  | -0.917683411   | 0.135945    | -6.75039 | 1.47E-11    | 7.38E-11    |
|                       | <i>HDAC1</i>     | 1837.61759  | -1.440049011   | 0.07919     | -18.1847 | 6.83E-74    | 2.10E-72    |
|                       | <i>HDAC10</i>    | 1006.19949  | -0.827671508   | 0.12377     | -6.68715 | 2.28E-11    | 1.13E-10    |
|                       | <i>HDAC11</i>    | 436.75663   | -1.635530783   | 0.35582     | -4.59651 | 4.30E-06    | 1.35E-05    |
|                       | <i>HDAC2</i>     | 2064.6272   | -0.928257864   | 0.078687    | -11.7969 | 4.05E-32    | 4.58E-31    |
|                       | <i>HDAC5</i>     | 2943.7166   | -2.473781357   | 0.136808    | -18.0822 | 4.40E-73    | 1.33E-71    |
|                       | <i>HDAC6</i>     | 769.893359  | -1.744486804   | 0.10855     | -16.0707 | 4.09E-58    | 9.03E-57    |
|                       | <i>HDAC7</i>     | 4326.56583  | -1.094712095   | 0.076709    | -14.2709 | 3.32E-46    | 5.52E-45    |
|                       | <i>HDAC8</i>     | 360.473621  | -1.221989305   | 0.192027    | -6.36365 | 1.97E-10    | 9.15E-10    |
| Transcription factors | <i>HDAC9</i>     | 1741.43601  | 1.635384808    | 0.084663    | 19.31631 | 3.92E-83    | 1.45E-81    |
|                       | <i>MYC</i>       | 2687.38979  | 2.035542877    | 0.083492    | 24.38001 | 2.79E-131   | 2.41E-129   |
|                       | <i>SP1</i>       | 2836.01523  | -1.660449115   | 0.107005    | -15.5175 | 2.64E-54    | 5.39E-53    |
|                       | <i>TP53</i>      | 1636.18803  | -0.825524365   | 0.173279    | -4.76414 | 1.90E-06    | 6.23E-06    |
|                       | <i>E2F1</i>      | 118.347932  | 1.414721068    | 0.261772    | 5.404393 | 6.50E-08    | 2.47E-07    |
|                       | <i>SUPT3H</i>    | 240.185055  | -1.060643369   | 0.144788    | -7.32549 | 2.38E-13    | 1.32E-12    |
|                       | <i>SUPT4H1</i>   | 1093.53484  | -1.33995859    | 0.107766    | -12.4339 | 1.71E-35    | 2.14E-34    |
|                       | <i>SUPT5H</i>    | 3813.92856  | -0.956058556   | 0.086227    | -11.0877 | 1.44E-28    | 1.45E-27    |
|                       | <i>SUPT7L</i>    | 1668.44434  | -0.79980986    | 0.069278    | -11.545  | 7.83E-31    | 8.47E-30    |
|                       | <i>SUPT20HL1</i> | 3.30043215  | 4.82121153     | 1.736145    | 2.776963 | 0.005486943 | 0.010684753 |
|                       | <i>SUPT20HL2</i> | 7.54434931  | 1.996950871    | 0.712557    | 2.802513 | 0.005070619 | 0.009942881 |
|                       | Stress markers   | <i>NPM1</i> | 16411.8445     | -1.41075702 | 0.07375  | -19.1289    | 1.45E-81    |
| <i>FBL</i>            |                  | 1552.17687  | -1.039356066   | 0.075219    | -13.8178 | 1.99E-43    | 3.09E-42    |
| <i>TIA1</i>           |                  | 1780.67043  | -1.021998961   | 0.110259    | -9.26909 | 1.88E-20    | 1.43E-19    |
| <i>G3BP1</i>          |                  | 3763.72243  | -0.715425201   | 0.082395    | -8.68287 | 3.86E-18    | 2.69E-17    |
| <i>NOP2</i>           |                  | 1120.71496  | 0.927145476    | 0.105057    | 8.82519  | 1.09E-18    | 7.79E-18    |

**Supplementary Videos Figure Legend**

**Supplementary Videos S1-S4** – U2OS cells expressing GFP tagged SFPQ were transfected with various antisense oligomers and imaged for 48 hours immediately after transfection. Including: **Video S1**: transfection with 2'O-methyl PS antisense oligomer alone; **Video S2**: transfection with DNA PO antisense oligomer; **Video S3**: transfection with 2'O-methyl PS antisense oligomer annealed with sense DNA PO oligomer; **Video S4**: cells treated with lipofectamine transfection reagent alone.
